# Supplementary material for: Evidence for embracing normative modeling
Source: eLife. 2023 Mar 13;12:e85082. doi: 10.7554/eLife.85082 (PMC10036120; doi:10.7554/eLife.85082)
Supplement: Supplementary file 1. — Description: For each included site, we show the sample size (N), age (mean, standard deviation), and sex distribution (Female/Male percent) in the training set (shown in blue) and testing set (shown in green) of the normative models of functional connectivity between large scale resting-state brain networks from the Yeo 17 network atlas. [file elife-85082-supp1.xlsx]

## Sheet: Sheet1
	Train			Test
Site	N	Sex (F/M)%	Age (m, s.d)	N	Sex	Age
					(F/M)%	(m, s.d)
ABCD_01	60	48.33, 51.67	9.87, 0.58	73	56.16, 43.84	9.95, 0.61
ABCD_02	244	47.54, 52.46	10.12, 0.64	258	47.29, 52.71	10.1, 0.62
ABCD_03	282	47.87, 52.13	9.87, 0.62	260	50, 50	9.91, 0.61
ABCD_04	258	49.61, 50.39	9.91, 0.64	268	50.37, 49.63	9.77, 0.64
ABCD_05	161	62.11, 37.89	9.85, 0.63	144	42.36, 57.64	9.96, 0.63
ABCD_06	228	54.82, 45.18	9.98, 0.58	240	48.75, 51.25	10.02, 0.59
ABCD_07	128	50.78, 49.22	9.86, 0.64	128	42.97, 57.03	9.93, 0.61
ABCD_08	113	50.44, 49.56	9.98, 0.63	104	45.19, 54.81	10.1, 0.59
ABCD_09	173	48.55, 51.45	10.05, 0.59	175	56, 44	9.89, 0.6
ABCD_10	187	48.66, 51.34	9.88, 0.62	223	45.29, 54.71	9.93, 0.64
ABCD_11	192	51.04, 48.96	9.88, 0.65	173	51.45, 48.55	9.79, 0.62
ABCD_12	70	50, 50	9.85, 0.6	68	1.47, 54.41	9.95, 0.55
ABCD_13	209	51.67, 48.33	9.84, 0.61	191	52.88, 47.12	9.84, 0.6
ABCD_14	286	48.6, 51.4	10.24, 0.51	220	45.45, 54.55	10.2, 0.54
ABCD_15	138	55.07, 44.93	9.94, 0.62	149	45.64, 54.36	10, 0.58
ABCD_16	458	46.29, 53.71	9.89, 0.64	462	42.64, 48.7	9.9, 0.66
ABCD_17	204	54.9, 45.1	9.84, 0.61	221	41.63, 58.37	9.87, 0.65
ABCD_18	97	37.11, 62.89	9.91, 0.67	109	53.21, 46.79	10, 0.6
ABCD_19	187	55.08, 44.92	10.12, 0.55	205	52.68, 47.32	10.1, 0.54
ABCD_20	278	50.72, 49.28	10.05, 0.48	259	54.44, 45.56	10.1, 0.5
ABCD_21	212	44.81, 55.19	9.97, 0.63	238	49.58, 50.42	9.94, 0.61
AOMIC_PIPO1	162	58.64, 41.36	22.2, 1.8	41	53.66, 46.34	22.4, 1.7
AOMIC_PIPO2	166	59.64, 40.36	22.2, 1.7	41	46.34, 53.66	22.1, 2.2
CAMCAN	495	49.49, 50.51	53.2, 18.3	124	54.84, 45.16	55.3, 20
CMI-HBN_CBIC	133	37.59, 62.41	11.9, 3.4	33	48.48, 51.52	11.7, 3.6
CMI-HBN_RU	74	37.84, 62.16	11.6, 3.6	18	38.89, 61.11	10.9, 3.5
CNP-35343.0	79	44.3, 55.7	31.1, 9.1	19	52.63, 47.37	32.1, 7.4
CNP-35426.0	18	44.44, 55.56	31.1, 8.2	4	75, 25	34.8, 10.9
HCP_A_MGH	130	51.54, 48.46	62.1, 16.1	33	51.52, 48.48	59.1, 15.6
HCP_A_UCLA	118	56.78, 43.22	55.9, 13.1	30	60, 40	59.3, 15.8
HCP_A_UM	164	56.71, 43.29	61.9, 17	41	48.78, 51.22	60.8, 16.2
HCP_A_WU	167	61.08, 38.92	61, 15.4	42	52.38, 47.62	60.2, 15.2
HCP_D_MGH	137	54.01, 45.99	14.7, 3.8	34	55.88, 44.12	13.1, 3.4
HCP_D_UCLA	82	50, 50	14.6, 3.7	21	23.81, 28.57	14.7, 4
HCP_D_UM	99	54.55, 44.44	13.8, 3.7	24	66.67, 37.5	13.7, 3.9
HCP_D_WU	94	48.94, 51.06	14.5, 3.9	23	52.17, 47.83	15.2, 4.2
HCP_YA	500	51.8, 48.2	28.5, 3.8	501	54.49, 45.51	28.9, 3.6
NKI-RS	136	48.53, 51.47	21.1, 6.5	34	50, 50	17.8, 6.5
PNC	630	55.37, 44.63	14.6, 3.3	158	43.04, 56.96	14.6, 8
ukb	6924	52.77, 47.23	62.4, 7.5	1732	55.25, 44.75	63.3, 7.5
UMich_IMPs	235	48.33, 51.67	12.9, 3.4	59	54.24, 45.76	12.5, 3.6
