# Supplementary material for: Evidence for embracing normative modeling
Source: eLife. 2023 Mar 13;12:e85082. doi: 10.7554/eLife.85082 (PMC10036120; doi:10.7554/eLife.85082)
Supplement: Supplementary file 2. — Description: For each included site, we show the sample size (N), age (mean, standard deviation), and sex distribution (Female/Male percent) of the normative models of surface area extracted for all regions of interest in the Destrieux Freesurfer atlas. [file elife-85082-supp2.xlsx]

## Sheet: Sheet1
Site	N	Age (m, s.d.)	Sex (F/M) %
ABCD_01	388	9.9, 0.62	51.29, 48.71
ABCD_02	542	10.1, 0.62	46.49, 53.51
ABCD_03	569	9.88, 0.66	47.1, 52.9
ABCD_04	631	9.82, 0.71	48.65, 51.35
ABCD_05	345	9.89, 0.63	51.59, 48.41
ABCD_06	564	9.94, 0.59	50.71, 49.29
ABCD_07	325	9.87, 0.62	47.08, 52.92
ABCD_08	336	9.95, 0.62	47.62, 52.38
ABCD_09	407	9.96, 0.61	49.14, 50.86
ABCD_10	575	9.86, 0.62	48.7, 51.3
ABCD_11	414	9.82, 0.62	49.76, 50.24
ABCD_12	161	9.88, 0.59	47.83, 52.17
ABCD_13	555	9.82, 0.59	49.91, 50.09
ABCD_14	583	10.2, 0.57	45.8, 54.2
ABCD_15	396	9.9, 0.6	44.95, 55.05
ABCD_16	921	9.9, 0.65	44.95, 55.05
ABCD_17	557	9.82, 0.63	47.94, 52.06
ABCD_18	341	9.91, 0.63	46.92, 53.08
ABCD_19	534	10.1, 0.55	50.94, 49.06
ABCD_20	640	10, 0.49	50, 50
ABCD_21	491	9.91, 0.62	45.21, 54.79
ABCD_22	35	10.2, 0.55	62.86, 37.14
ATT	31	23, 1.88	9.68, 90.32
ATV	77	22.7, 1.98	77.92, 22.08
CAMCAN	647	54.2, 18.6	50.85, 49.15
CIN	136	52.4, 15.5	36.76, 63.24
CMI-RU	563	10.3, 3.49	34.81, 65.19
CMI-SI	341	11.2, 3.83	43.11, 56.89
CNP-35343.0	153	33.3, 9.38	47.71, 52.29
CNP-35426.0	79	33.3, 9.24	32.91, 67.09
COI	193	49.4, 13.5	61.14, 38.86
ds001734	108	25.5, 3.59	55.56, 44.44
ds002236	86	11.5, 2.04	44.19, 55.81
ds002330	65	26.2, 4.3	55.38, 44.62
ds002345	207	21.7, 4.71	63.29, 36.71
ds002731	59	21.3, 1.45	47.46, 52.54
ds002837	86	26.7, 10.1	48.84, 51.16
HCP-Aging_MGH	171	59.8, 15.5	50.29, 49.71
HCP-Aging_UCLA	124	53.3, 12.8	57.26, 42.74
HCP-Aging_UMinn	204	61.6, 16.3	58.82, 41.18
HCP-Aging_WashU	178	58.5, 13.8	62.92, 37.08
HCP-Dev_MGH	216	13.8, 3.87	50.46, 49.54
HCP-Dev_UCLA	127	14.1, 3.82	48.82, 51.18
HCP-Dev_UMinn	156	13.3, 3.64	54.49, 45.51
HCP-Dev_WashU	154	14, 3.87	48.7, 51.3
HCP-EP_BWH	31	22.6, 4	32.26, 67.74
HCP-EP_IU	84	23.2, 3.82	39.29, 60.71
HCP-EP_McL	44	24.1, 3.56	43.18, 56.82
HCP-EP_MGH	21	24.1, 5.44	28.57, 71.43
HCP-YA	1113	28.8, 3.7	54.45, 45.55
HKH	62	45.1, 10.5	48.39, 51.61
HRC	65	41.4, 11.5	70.77, 29.23
HUH	124	38.7, 13.3	50.81, 49.19
IXI	581	49.5, 16.7	56.28, 43.72
KTT	121	32.4, 10.3	38.84, 61.16
KUT	220	38, 13.1	43.64, 56.36
NKI	482	42.6, 21.2	63.9, 36.1
NKN	9	63.6, 18.5	44.44, 55.56
Oasis3	2044	70.4, 9.51	42.37, 57.63
PNC	1378	14.2, 3.51	50.87, 49.13
SWA	234	31.4, 8.75	14.53, 85.47
SWU_SLIM	569	20.1, 1.27	56.24, 43.76
TOP	823	33.2, 10.2	47.14, 52.86
ukb-11025.0	16132	62.5, 7.5	51.83, 48.17
ukb-11026.0	658	65.3, 7.37	54.86, 45.14
ukb-11027.0	3880	63.7, 7.46	53.92, 46.08
UTO	351	35.4, 14.6	45.58, 54.42
