# Supplementary material for: Evidence for embracing normative modeling
Source: eLife. 2023 Mar 13;12:e85082. doi: 10.7554/eLife.85082 (PMC10036120; doi:10.7554/eLife.85082)
Supplement: Supplementary file 3. — Description: We show for all cortical thickness and subcortical volume from the Destrieux and aseg Freesurfer atlases regions of interest (ROIs from a two-sample t-test between Schizophrenia versus Healthy Controls) the t-statistic (T-stat), False Discovery Rate corrected p-value (FDRcorr_pvalue), and uncorrected p-value (uncorr_pvalue) for both the raw data (shown in green) and the deviation scores (shown in blue). [file elife-85082-supp3.xlsx]

## Sheet: Sheet1
	Raw Data			Deviation Scores
ROI	T-stat	FDRcorr_pvalue	uncorr_pvalue	T-stat	FDRcorr_pvalue	uncorr_pvalue
rh_S_orbital-H_Shaped_thickness	-0.84	0.87	0.41	-2.83	0.01	0.0051
Left-Amygdala	-1.37	0.69	0.18	-2.74	0.02	0.0068
lh_G_parietal_sup_thickness	1.82	0.65	0.08	-2.61	0.02	0.0096
rh_MeanThickness_thickness	-2.37	0.6	0.02	-4.76	0	0
lh_G&S_frontomargin_thickness	-0.47	0.94	0.64	-2.21	0.05	0.0285
rh_Pole_temporal_thickness	-0.98	0.83	0.33	-3.37	0	0.0009
rh_S_central_thickness	-0.2	0.98	0.84	-1.45	0.19	0.1494
rh_G_occipital_middle_thickness	0.71	0.92	0.49	-2.27	0.04	0.0243
rh_G_oc-temp_med-Parahip_thickness	-0.57	0.92	0.57	-3.23	0.01	0.0015
Right-Caudate	-0.01	0.99	0.99	1.08	0.33	0.2806
lh_S_interm_prim-Jensen_thickness	0.4	0.96	0.69	0.28	0.81	0.781
rh_G_temporal_middle_thickness	-2.3	0.6	0.03	-3.64	0	0.0004
lh_G_cingul-Post-dorsal_thickness	-0.84	0.87	0.41	-3.12	0.01	0.002
Left-vessel	-2	0.61	0.05	0.82	0.47	0.4104
rh_S_oc_sup&transversal_thickness	-1.34	0.69	0.19	-1.55	0.16	0.1233
TotalGrayVol	-0.9	0.85	0.37	-1.95	0.08	0.0522
lh_G_rectus_thickness	-1.21	0.76	0.24	-1.7	0.12	0.0906
rh_G_postcentral_thickness	-2.31	0.6	0.03	-2.05	0.06	0.0416
lh_G&S_paracentral_thickness	-0.45	0.94	0.65	-2.57	0.02	0.0109
SubCortGrayVol	0.68	0.92	0.5	-1.31	0.24	0.1927
lh_S_precentral-sup-part_thickness	-1.88	0.64	0.07	-2.66	0.02	0.0084
rh_G_cuneus_thickness	-1.09	0.78	0.28	-3.93	0	0.0001
lh_G_temp_sup-Lateral_thickness	-2.11	0.6	0.04	-2.65	0.02	0.0087
rh_S_temporal_transverse_thickness	-1.24	0.74	0.22	-0.51	0.65	0.6107
rh_G&S_cingul-Mid-Ant_thickness	0.4	0.96	0.69	-3.13	0.01	0.002
lh_Lat_Fis-ant-Vertical_thickness	-0.72	0.92	0.48	-2.15	0.05	0.0324
Left-Pallidum	0.09	0.99	0.93	1.25	0.26	0.2143
rh_S_parieto_occipital_thickness	1.1	0.77	0.28	-3.33	0	0.001
Right-Amygdala	0.07	0.99	0.95	-3.41	0	0.0008
rh_S_orbital_med-olfact_thickness	0.24	0.98	0.82	-0.24	0.84	0.8118
lh_S_temporal_transverse_thickness	-1.31	0.7	0.2	0.09	0.94	0.9279
rh_G_pariet_inf-Angular_thickness	-1.17	0.76	0.25	-3.04	0.01	0.0027
SupraTentorialVolNotVent	-1.27	0.72	0.21	-1.46	0.19	0.1469
lh_S_orbital_lateral_thickness	-1.4	0.69	0.17	-3.07	0.01	0.0024
lh_S_postcentral_thickness	0.44	0.94	0.66	-2.36	0.03	0.0192
rh_S_calcarine_thickness	-0.25	0.98	0.8	-1.53	0.16	0.1268
lh_G_orbital_thickness	-2.96	0.29	0.01	-2.52	0.02	0.0126
Brain-Stem	-0.79	0.89	0.43	-0.5	0.66	0.6202
lh_S_circular_insula_ant_thickness	-0.19	0.98	0.85	-3.35	0	0.001
rh_S_precentral-sup-part_thickness	-1.69	0.67	0.1	-2.24	0.04	0.0259
rh_G&S_occipital_inf_thickness	-0.55	0.92	0.59	-2.11	0.06	0.0365
rh_S_collat_transv_ant_thickness	0.42	0.95	0.67	-3.31	0	0.0011
lh_G_occipital_sup_thickness	-1.66	0.67	0.11	-0.69	0.55	0.4918
rh_G_temp_sup-Lateral_thickness	-1.13	0.76	0.26	-2.33	0.04	0.0206
rh_S_circular_insula_sup_thickness	0.63	0.92	0.53	-4.7	0	0
lh_G_temp_sup-G_T_transv_thickness	0.86	0.87	0.39	1.47	0.19	0.1437
3rd-Ventricle	-1.03	0.82	0.31	4.54	0	0
CSF	-2.08	0.6	0.05	2.47	0.03	0.0143
lh_Pole_temporal_thickness	-0.52	0.92	0.6	-2.28	0.04	0.0238
rh_S_orbital_lateral_thickness	-0.01	0.99	0.99	-2.99	0.01	0.0031
lh_S_orbital_med-olfact_thickness	-3.03	0.29	0	-1.1	0.33	0.2712
lh_S_oc-temp_lat_thickness	-1.26	0.72	0.21	-2.84	0.01	0.0049
lh_S_cingul-Marginalis_thickness	-1.16	0.76	0.25	-0.87	0.44	0.3875
Left-Thalamus-Proper	-1.34	0.69	0.19	-0.4	0.72	0.6932
rh_G_front_middle_thickness	-0.53	0.92	0.6	-2.58	0.02	0.0107
lh_G_temp_sup-Plan_polar_thickness	0.69	0.92	0.49	-2.22	0.04	0.0272
rh_Lat_Fis-ant-Vertical_thickness	1.48	0.69	0.15	-3.68	0	0.0003
Right-vessel	-0.79	0.89	0.43	0.4	0.72	0.6863
rh_S_front_middle_thickness	0.02	0.99	0.99	-1.41	0.2	0.1588
Left-Hippocampus	-0.31	0.96	0.76	-3.56	0	0.0005
rh_G&S_subcentral_thickness	-1.36	0.69	0.18	-3.07	0.01	0.0025
lh_G_temporal_inf_thickness	-3.04	0.29	0	-2.2	0.05	0.0291
rh_S_cingul-Marginalis_thickness	-1.32	0.69	0.19	-2.52	0.02	0.0123
rh_G_oc-temp_lat-fusifor_thickness	-0.77	0.9	0.45	-3.17	0.01	0.0017
rh_S_subparietal_thickness	-0.96	0.83	0.34	-2.27	0.04	0.0243
lh_G_oc-temp_med-Parahip_thickness	0.32	0.96	0.75	-1.95	0.08	0.0527
Right-Cerebellum-Cortex	0.01	0.99	0.99	0.13	0.92	0.8958
rh_G_cingul-Post-ventral_thickness	-1.13	0.76	0.27	-2.44	0.03	0.0154
rh_G&S_cingul-Mid-Post_thickness	-0.09	0.99	0.93	-2.95	0.01	0.0036
rh_S_front_inf_thickness	-0.36	0.96	0.72	-4.02	0	0.0001
Right-Cerebellum-White-Matter	0.22	0.98	0.83	-0.1	0.94	0.918
rh_S_interm_prim-Jensen_thickness	-0.22	0.98	0.82	-1.26	0.25	0.2083
lh_S_calcarine_thickness	0.3	0.96	0.76	-2.2	0.05	0.0288
lh_G_front_inf-Triangul_thickness	-0.59	0.92	0.56	-3.12	0.01	0.0021
lh_G&S_occipital_inf_thickness	-1.21	0.76	0.23	-4.4	0	0
Right-Hippocampus	-1.53	0.69	0.14	-4.14	0	0.0001
Right-VentralDC	-0.97	0.83	0.34	-1.31	0.24	0.1923
Right-Inf-Lat-Vent	0.52	0.92	0.61	4.45	0	0
Left-Cerebellum-Cortex	0.32	0.96	0.75	-0.77	0.5	0.4418
rh_G_occipital_sup_thickness	0.06	0.99	0.95	-0.78	0.49	0.4373
rh_G_parietal_sup_thickness	-0.57	0.92	0.57	-1.88	0.09	0.0609
lh_G_Ins_lg&S_cent_ins_thickness	-1.1	0.77	0.28	-2.96	0.01	0.0034
rh_S_precentral-inf-part_thickness	-0.87	0.87	0.39	-4.23	0	0
rh_S_temporal_inf_thickness	-1.78	0.65	0.08	-2.98	0.01	0.0032
lh_S_collat_transv_ant_thickness	-1.33	0.69	0.19	-1.81	0.1	0.0711
lh_G_subcallosal_thickness	-1.04	0.82	0.31	-0.01	0.99	0.9923
lh_G_pariet_inf-Supramar_thickness	-0.11	0.99	0.91	-4.42	0	0
lh_MeanThickness_thickness	0.71	0.92	0.49	-4.68	0	0
rh_S_collat_transv_post_thickness	0.57	0.92	0.57	-3.46	0	0.0007
rh_G_insular_short_thickness	0.14	0.99	0.89	-1.84	0.09	0.0677
Right-Thalamus-Proper	-1.55	0.69	0.13	-0.64	0.57	0.5231
rh_G_front_sup_thickness	-1.57	0.69	0.13	-2.7	0.02	0.0076
lh_G_temp_sup-Plan_tempo_thickness	-1.95	0.63	0.06	-1.31	0.24	0.1928
lh_G_pariet_inf-Angular_thickness	-0.97	0.83	0.34	-2.95	0.01	0.0035
rh_Lat_Fis-ant-Horizont_thickness	0.22	0.98	0.83	-1.36	0.22	0.1743
lh_S_central_thickness	-1.48	0.69	0.15	-3.15	0.01	0.0019
lh_G_oc-temp_lat-fusifor_thickness	-1.4	0.69	0.17	-2.83	0.01	0.0051
lh_G_insular_short_thickness	-2.03	0.61	0.05	-3.73	0	0.0003
lh_S_collat_transv_post_thickness	-1.64	0.67	0.11	-3.12	0.01	0.0021
rh_S_front_sup_thickness	-0.09	0.99	0.93	-2.94	0.01	0.0037
rh_S_oc-temp_lat_thickness	0.75	0.9	0.46	-5.46	0	0
lh_S_precentral-inf-part_thickness	0.85	0.87	0.4	-3	0.01	0.003
Right-Lateral-Ventricle	1.55	0.69	0.13	4.23	0	0
Right-Accumbens-area	0.39	0.96	0.7	-4.55	0	0
lh_S_pericallosal_thickness	-2.18	0.6	0.04	-1.07	0.34	0.2848
rh_S_circular_insula_inf_thickness	-1.75	0.65	0.09	-2.71	0.02	0.0073
rh_S_intrapariet&P_trans_thickness	-1.49	0.69	0.15	-2.41	0.03	0.0169
lh_S_oc_sup&transversal_thickness	-2.11	0.6	0.04	-2.38	0.03	0.0181
rh_G_precuneus_thickness	-1.47	0.69	0.15	-3.76	0	0.0002
lh_G_oc-temp_med-Lingual_thickness	-1.41	0.69	0.17	-3.32	0	0.0011
rh_S_oc_middle&Lunatus_thickness	-1.39	0.69	0.17	-2.65	0.02	0.0086
lh_S_circular_insula_inf_thickness	-2.91	0.29	0.01	-3.27	0.01	0.0013
lh_G&S_transv_frontopol_thickness	-0.44	0.94	0.66	-2.01	0.07	0.0457
rh_S_pericallosal_thickness	-0.39	0.96	0.7	-0.96	0.39	0.3361
rh_G_front_inf-Triangul_thickness	-0.63	0.92	0.54	-4.31	0	0
lh_Pole_occipital_thickness	-0.11	0.99	0.92	-1.96	0.08	0.0517
rh_S_oc-temp_med&Lingual_thickness	-0.63	0.92	0.53	-3.51	0	0.0006
4th-Ventricle	-2.28	0.6	0.03	1.76	0.11	0.0802
lh_S_circular_insula_sup_thickness	-1.46	0.69	0.15	-3.77	0	0.0002
EstimatedTotalIntraCranialVol	0.12	0.99	0.9	1.06	0.34	0.2908
Right-Pallidum	-0.14	0.99	0.89	0.85	0.45	0.3972
rh_G_temp_sup-Plan_polar_thickness	0.97	0.83	0.34	-2.14	0.05	0.0332
Left-Putamen	-1.74	0.65	0.09	-0.67	0.56	0.5033
lh_G&S_subcentral_thickness	2.14	0.6	0.04	-1.62	0.14	0.1058
Right-choroid-plexus	-1.75	0.65	0.09	2.43	0.03	0.0158
lh_G_occipital_middle_thickness	1.76	0.65	0.09	-2.73	0.02	0.0068
lh_G_cingul-Post-ventral_thickness	0.91	0.85	0.37	-0.65	0.57	0.5142
rh_G_cingul-Post-dorsal_thickness	-0.45	0.94	0.66	-3.8	0	0.0002
rh_G&S_frontomargin_thickness	0.11	0.99	0.91	-2.54	0.02	0.0117
rh_G_temp_sup-G_T_transv_thickness	0.3	0.96	0.76	-0.58	0.61	0.5645
rh_G&S_paracentral_thickness	0.36	0.96	0.72	-3.16	0.01	0.0018
Right-Putamen	1.63	0.67	0.11	-0.56	0.62	0.5769
rh_S_circular_insula_ant_thickness	-0.94	0.84	0.36	-2.51	0.02	0.0127
rh_G_front_inf-Opercular_thickness	0.04	0.99	0.97	-3.8	0	0.0002
lh_S_temporal_sup_thickness	-0.05	0.99	0.96	-3.51	0	0.0006
rh_S_postcentral_thickness	0.31	0.96	0.75	-2.7	0.02	0.0075
lh_S_occipital_ant_thickness	-0.02	0.99	0.98	-2.24	0.04	0.0261
rh_G_temp_sup-Plan_tempo_thickness	-0.28	0.96	0.78	-1.93	0.08	0.0549
lh_G_temporal_middle_thickness	-0.64	0.92	0.53	-2.94	0.01	0.0036
lh_G_front_middle_thickness	-0.23	0.98	0.82	-2.9	0.01	0.0041
Left-Caudate	0.56	0.92	0.58	-0.08	0.95	0.9362
rh_Lat_Fis-post_thickness	0.2	0.98	0.84	-3.26	0.01	0.0013
lh_G_front_sup_thickness	0.63	0.92	0.53	-3.09	0.01	0.0023
Left-VentralDC	0.63	0.92	0.53	-1.68	0.13	0.0948
lh_G_cuneus_thickness	0.52	0.92	0.6	-1.02	0.36	0.3084
lh_S_suborbital_thickness	-0.6	0.92	0.55	-2.91	0.01	0.004
lh_G&S_cingul-Mid-Post_thickness	0.44	0.94	0.66	-3.31	0	0.0011
rh_G_orbital_thickness	0.36	0.96	0.72	-3.09	0.01	0.0023
rh_G_rectus_thickness	-1.19	0.76	0.24	-1.07	0.34	0.2854
rh_G&S_cingul-Ant_thickness	-0.81	0.88	0.42	-3.57	0	0.0005
rh_G_pariet_inf-Supramar_thickness	-0.52	0.92	0.61	-3.9	0	0.0001
lh_S_orbital-H_Shaped_thickness	0.92	0.85	0.37	-3.64	0	0.0003
lh_S_front_sup_thickness	1.39	0.69	0.17	-2.66	0.02	0.0084
lh_G_front_inf-Orbital_thickness	0.1	0.99	0.92	-2.59	0.02	0.0102
lh_S_parieto_occipital_thickness	0.02	0.99	0.99	-2.98	0.01	0.0033
lh_G_front_inf-Opercular_thickness	1.52	0.69	0.14	-2.77	0.01	0.0062
lh_S_subparietal_thickness	0.34	0.96	0.74	-2.03	0.07	0.0435
lh_S_oc_middle&Lunatus_thickness	0.5	0.92	0.62	-1.72	0.12	0.0863
lh_G_precuneus_thickness	-0.99	0.83	0.33	-3.05	0.01	0.0026
lh_G&S_cingul-Ant_thickness	-0.83	0.87	0.41	-3.64	0	0.0003
lh_Lat_Fis-ant-Horizont_thickness	1.63	0.67	0.11	-2.04	0.06	0.0422
rh_S_temporal_sup_thickness	0.24	0.98	0.82	-3.31	0	0.0011
lh_G_precentral_thickness	0.57	0.92	0.58	-2.7	0.02	0.0076
lh_G_postcentral_thickness	-0.22	0.98	0.83	-2.4	0.03	0.0175
lh_G&S_cingul-Mid-Ant_thickness	-0.06	0.99	0.96	-2.41	0.03	0.0168
Left-Cerebellum-White-Matter	1.91	0.63	0.06	-0.46	0.68	0.6465
lh_S_intrapariet&P_trans_thickness	-1.91	0.63	0.06	-2.02	0.07	0.0451
lh_Lat_Fis-post_thickness	-0.37	0.96	0.72	-2.7	0.02	0.0075
Left-choroid-plexus	-0.16	0.99	0.88	2.53	0.02	0.0121
rh_S_occipital_ant_thickness	0.59	0.92	0.56	-2.96	0.01	0.0035
lh_S_oc-temp_med&Lingual_thickness	1.18	0.76	0.25	-2.92	0.01	0.0038
lh_S_front_inf_thickness	0.08	0.99	0.94	-2.04	0.06	0.0429
lh_S_front_middle_thickness	0.75	0.9	0.46	-2	0.07	0.047
Left-Inf-Lat-Vent	0.36	0.96	0.72	3.9	0	0.0001
rh_G_Ins_lg&S_cent_ins_thickness	0.14	0.99	0.89	-1.17	0.29	0.243
Left-Lateral-Ventricle	0.57	0.92	0.57	3.71	0	0.0003
rh_G_front_inf-Orbital_thickness	0.68	0.92	0.5	-3.53	0	0.0005
rh_G_oc-temp_med-Lingual_thickness	0.69	0.92	0.5	-2.2	0.05	0.0293
lh_S_temporal_inf_thickness	0.59	0.92	0.56	-4.1	0	0.0001
rh_G_precentral_thickness	2.14	0.6	0.04	-3.08	0.01	0.0024
rh_G_subcallosal_thickness	0.3	0.96	0.77	-0.54	0.63	0.5892
rh_G&S_transv_frontopol_thickness	-0.51	0.92	0.62	-1.69	0.12	0.0917
rh_Pole_occipital_thickness	0.95	0.83	0.35	-1.75	0.11	0.0808
Left-Accumbens-area	-0.02	0.99	0.98	-3.38	0	0.0009
rh_G_temporal_inf_thickness	1.02	0.83	0.32	-3.09	0.01	0.0023
rh_S_suborbital_thickness	1.13	0.76	0.27	-0.07	0.95	0.9456
