# Supplementary material for: Evidence for embracing normative modeling
Source: eLife. 2023 Mar 13;12:e85082. doi: 10.7554/eLife.85082 (PMC10036120; doi:10.7554/eLife.85082)
Supplement: Supplementary file 4. — Description: We show for all Yeo-17 between network connectivity regions of interest (ROIs) from a two-sample t-test between Schizophrenia versus Healthy Controls the t-statistic (T-stat), False Discovery Rate corrected p-value (FDRcorr_pvalue), and uncorrected p-value (uncorr_pvalue) for both the raw data (shown in green) and the deviation scores (shown in blue). [file elife-85082-supp4.xlsx]

## Sheet: Sheet1
	Raw Data			Deviation Scores
ROI	T-stat	FDRcorr_pvalue	uncorr_pvalue	T-stat	FDRcorr_pvalue	uncorr_pvalue
VisualA_VisualB	-2.4	0.23	0.02	-2.72	0.024	0.0071
VisualA_SensorimotorA	-0.37	0.86	0.72	0.74	0.55	0.4613
VisualA_SensorimotorB	-0.3	0.87	0.77	-1.35	0.265	0.1773
VisualA_DorsalAttnA	-1.34	0.63	0.18	-2.15	0.073	0.0324
VisualA_DorsalAttnB	-0.97	0.74	0.33	-1.45	0.236	0.1495
VisualA_VentralAttnA	-1.41	0.63	0.16	-0.6	0.642	0.552
VisualA_VentralAttnB	0.11	0.94	0.91	-2.56	0.034	0.0111
VisualA_LimbicA	-2.53	0.2	0.01	0.09	0.947	0.9263
VisualA_LimbicB	-0.47	0.84	0.64	-0.02	0.983	0.9831
VisualA_ControlA	-1.04	0.7	0.3	-1.97	0.104	0.0503
VisualA_ControlB	-0.2	0.88	0.84	-3.06	0.012	0.0025
VisualA_ControlC	0.96	0.74	0.34	-2.7	0.025	0.0075
VisualA_DefaultA	-0.58	0.8	0.56	-1.79	0.143	0.0747
VisualA_DefaultB	0.23	0.87	0.82	-5.42	0	0
VisualA_DefaultC	0.76	0.75	0.45	-4.01	0.001	0.0001
VisualA_TemporalParietal	0.4	0.85	0.69	-1.24	0.304	0.2168
VisualB_SensorimotorA	-1.6	0.57	0.11	0.38	0.775	0.7076
VisualB_SensorimotorB	-0.85	0.75	0.4	-3.08	0.012	0.0023
VisualB_DorsalAttnA	-1.71	0.57	0.09	-3.45	0.004	0.0007
VisualB_DorsalAttnB	-1.53	0.57	0.13	-1.82	0.137	0.0704
VisualB_VentralAttnA	-1.04	0.7	0.3	-1.53	0.211	0.1274
VisualB_VentralAttnB	0.21	0.87	0.83	-2.55	0.034	0.0115
VisualB_LimbicA	-3.48	0.08	0	-1.3	0.286	0.1954
VisualB_LimbicB	-0.76	0.75	0.45	-5.17	0	0
VisualB_ControlA	-0.92	0.74	0.36	-0.34	0.796	0.7377
VisualB_ControlB	-0.61	0.8	0.54	-3.71	0.002	0.0003
VisualB_ControlC	0.24	0.87	0.81	-0.71	0.564	0.477
VisualB_DefaultA	-1.63	0.57	0.11	-3.93	0.001	0.0001
VisualB_DefaultB	-0.78	0.75	0.44	-2.07	0.083	0.0393
VisualB_DefaultC	-0.73	0.76	0.47	-0.97	0.424	0.3336
VisualB_TemporalParietal	-1.33	0.63	0.18	-2.85	0.019	0.0049
SensorimotorA_SensorimotorB	-0.84	0.75	0.4	-4.65	0	0
SensorimotorA_DorsalAttnA	-0.83	0.75	0.41	-3.08	0.012	0.0023
SensorimotorA_DorsalAttnB	-1.41	0.63	0.16	-4.16	0	0
SensorimotorA_VentralAttnA	0.4	0.85	0.69	-2.99	0.014	0.0031
SensorimotorA_VentralAttnB	1.58	0.57	0.12	-0.53	0.675	0.5966
SensorimotorA_LimbicA	-2.75	0.16	0.01	-2.41	0.045	0.0167
SensorimotorA_LimbicB	-1.16	0.69	0.25	-0.79	0.53	0.4322
SensorimotorA_ControlA	-0.79	0.75	0.43	-0.02	0.983	0.983
SensorimotorA_ControlB	-0.52	0.82	0.6	-0.52	0.675	0.6053
SensorimotorA_ControlC	1.06	0.7	0.29	-1.57	0.21	0.1188
SensorimotorA_DefaultA	-0.35	0.86	0.72	0.57	0.65	0.5663
SensorimotorA_DefaultB	-1.82	0.53	0.07	-1.55	0.211	0.123
SensorimotorA_DefaultC	-0.58	0.8	0.57	-4.38	0	0
SensorimotorA_TemporalParietal	-0.36	0.86	0.72	-2.15	0.073	0.0329
SensorimotorB_DorsalAttnA	-0.75	0.75	0.45	-4.2	0	0
SensorimotorB_DorsalAttnB	-0.77	0.75	0.44	-0.78	0.533	0.4389
SensorimotorB_VentralAttnA	-0.02	0.98	0.98	-3.85	0.001	0.0002
SensorimotorB_VentralAttnB	1.28	0.64	0.2	-3.96	0.001	0.0001
SensorimotorB_LimbicA	-2.86	0.16	0	-2.94	0.016	0.0036
SensorimotorB_LimbicB	-1.09	0.7	0.28	-0.22	0.877	0.8256
SensorimotorB_ControlA	-0.5	0.82	0.62	0.96	0.429	0.3405
SensorimotorB_ControlB	-0.29	0.87	0.77	-1.02	0.407	0.3109
SensorimotorB_ControlC	0.65	0.79	0.52	-1.09	0.371	0.2781
SensorimotorB_DefaultA	-0.8	0.75	0.42	-2.47	0.041	0.0142
SensorimotorB_DefaultB	-1.52	0.57	0.13	-1.14	0.347	0.2576
SensorimotorB_DefaultC	-1.27	0.64	0.21	-1.23	0.306	0.2202
SensorimotorB_TemporalParietal	-1.41	0.63	0.16	-2.76	0.024	0.0062
DorsalAttnA_DorsalAttnB	-1.03	0.7	0.3	-1.04	0.393	0.2975
DorsalAttnA_VentralAttnA	-0.82	0.75	0.41	-1.45	0.236	0.1485
DorsalAttnA_VentralAttnB	0.42	0.85	0.68	-3.29	0.006	0.0012
DorsalAttnA_LimbicA	-2.76	0.16	0.01	-2.27	0.059	0.0242
DorsalAttnA_LimbicB	-0.56	0.8	0.57	-1.77	0.147	0.0787
DorsalAttnA_ControlA	-0.53	0.82	0.6	-1.16	0.334	0.2454
DorsalAttnA_ControlB	-1.2	0.68	0.23	-5.23	0	0
DorsalAttnA_ControlC	0.45	0.84	0.66	-4.25	0	0
DorsalAttnA_DefaultA	-1.53	0.57	0.13	-1.26	0.297	0.2098
DorsalAttnA_DefaultB	-0.94	0.74	0.35	-1	0.413	0.3196
DorsalAttnA_DefaultC	-0.28	0.87	0.78	-2.73	0.024	0.0069
DorsalAttnA_TemporalParietal	-1.39	0.63	0.17	-1.42	0.248	0.1583
DorsalAttnB_VentralAttnA	0.34	0.86	0.73	-3.79	0.001	0.0002
DorsalAttnB_VentralAttnB	1.24	0.66	0.22	-3.63	0.002	0.0004
DorsalAttnB_LimbicA	-2.98	0.16	0	-1.39	0.25	0.1657
DorsalAttnB_LimbicB	-0.83	0.75	0.41	1.4	0.249	0.1616
DorsalAttnB_ControlA	-0.69	0.77	0.49	-1.28	0.294	0.203
DorsalAttnB_ControlB	-1.11	0.7	0.27	-2.45	0.042	0.0152
DorsalAttnB_ControlC	0.42	0.85	0.67	-0.03	0.983	0.9795
DorsalAttnB_DefaultA	-1.67	0.57	0.1	-4.03	0.001	0.0001
DorsalAttnB_DefaultB	-2.11	0.44	0.04	-1.19	0.326	0.2371
DorsalAttnB_DefaultC	-0.92	0.74	0.36	-0.15	0.918	0.8844
DorsalAttnB_TemporalParietal	-1.63	0.57	0.11	-1.89	0.118	0.0601
VentralAttnA_VentralAttnB	0.68	0.77	0.5	-3.06	0.012	0.0025
VentralAttnA_LimbicA	-2.73	0.16	0.01	-1.35	0.266	0.1801
VentralAttnA_LimbicB	-0.77	0.75	0.44	-2.89	0.018	0.0043
VentralAttnA_ControlA	-0.32	0.87	0.75	-1.54	0.211	0.1249
VentralAttnA_ControlB	0.22	0.87	0.83	-2.12	0.078	0.0354
VentralAttnA_ControlC	0.7	0.77	0.49	-1.53	0.211	0.1264
VentralAttnA_DefaultA	-1.26	0.64	0.21	-1.27	0.294	0.2055
VentralAttnA_DefaultB	-1.54	0.57	0.13	-0.16	0.915	0.8745
VentralAttnA_DefaultC	-0.96	0.74	0.34	-4.7	0	0
VentralAttnA_TemporalParietal	-1.07	0.7	0.29	-2.23	0.063	0.0268
VentralAttnB_LimbicA	-1.55	0.57	0.12	0.19	0.9	0.8533
VentralAttnB_LimbicB	-0.24	0.87	0.81	-2.77	0.024	0.0061
VentralAttnB_ControlA	-0.96	0.74	0.34	-4.69	0	0
VentralAttnB_ControlB	0.85	0.75	0.4	-2.1	0.079	0.0367
VentralAttnB_ControlC	-0.34	0.86	0.73	-1.49	0.225	0.139
VentralAttnB_DefaultA	-0.46	0.84	0.65	-2.05	0.088	0.042
VentralAttnB_DefaultB	-0.24	0.87	0.81	-0.29	0.823	0.7683
VentralAttnB_DefaultC	-0.51	0.82	0.61	0.37	0.775	0.7124
VentralAttnB_TemporalParietal	-0.56	0.8	0.58	-0.52	0.675	0.6035
LimbicA_LimbicB	-0.46	0.84	0.65	-0.75	0.544	0.4522
LimbicA_ControlA	-1.87	0.53	0.06	-2.72	0.024	0.0071
LimbicA_ControlB	-1.87	0.53	0.06	-2.74	0.024	0.0067
LimbicA_ControlC	-1.11	0.7	0.27	-2.31	0.054	0.0218
LimbicA_DefaultA	-2.5	0.2	0.01	-0.99	0.413	0.3222
LimbicA_DefaultB	-2.51	0.2	0.01	-2.57	0.034	0.0108
LimbicA_DefaultC	-1.86	0.53	0.07	-2.67	0.026	0.0081
LimbicA_TemporalParietal	-1.82	0.53	0.07	-2.34	0.051	0.02
LimbicB_ControlA	-0.26	0.87	0.8	-1.73	0.157	0.0857
LimbicB_ControlB	-0.24	0.87	0.81	-0.57	0.65	0.5687
LimbicB_ControlC	0.12	0.93	0.9	-1.93	0.113	0.0555
LimbicB_DefaultA	-1.08	0.7	0.28	-2.39	0.047	0.0179
LimbicB_DefaultB	0.06	0.96	0.95	-0.1	0.945	0.9169
LimbicB_DefaultC	-0.6	0.8	0.55	-0.83	0.503	0.4068
LimbicB_TemporalParietal	-1.04	0.7	0.3	-2.23	0.063	0.0266
ControlA_ControlB	-0.68	0.77	0.5	-1.76	0.147	0.0791
ControlA_ControlC	-1.31	0.63	0.19	-3.3	0.006	0.0011
ControlA_DefaultA	-0.26	0.87	0.79	-2.15	0.073	0.0323
ControlA_DefaultB	-1.63	0.57	0.11	-0.85	0.497	0.3986
ControlA_DefaultC	-1.7	0.57	0.09	-1.91	0.114	0.0572
ControlA_TemporalParietal	-1.18	0.69	0.24	-4.35	0	0
ControlB_ControlC	-0.56	0.8	0.58	-1.4	0.249	0.1631
ControlB_DefaultA	-0.6	0.8	0.55	-2.67	0.026	0.0081
ControlB_DefaultB	-1.88	0.53	0.06	-2.43	0.043	0.0159
ControlB_DefaultC	-1.32	0.63	0.19	-1.49	0.225	0.138
ControlB_TemporalParietal	-1.85	0.53	0.07	-1.59	0.206	0.1136
ControlC_DefaultA	0.4	0.85	0.69	0.44	0.733	0.663
ControlC_DefaultB	0.58	0.8	0.56	-4.05	0.001	0.0001
ControlC_DefaultC	-0.06	0.96	0.95	-4.61	0	0
ControlC_TemporalParietal	-0.21	0.87	0.83	1.56	0.21	0.1206
DefaultA_DefaultB	-1.32	0.63	0.19	-2.34	0.051	0.0201
DefaultA_DefaultC	-0.71	0.77	0.48	-2.45	0.042	0.0149
DefaultA_TemporalParietal	-1.16	0.69	0.25	-1.58	0.208	0.116
DefaultB_DefaultC	-1.38	0.63	0.17	-2.87	0.019	0.0046
DefaultB_TemporalParietal	-0.83	0.75	0.41	-0.68	0.587	0.5003
DefaultC_TemporalParietal	-0.78	0.75	0.44	-4.67	0	0
